# **Synergistic cues from diverse bacteria enhance multicellular development in a choanoflagellate**

## **Running title:**

### **5 Synergistic bacterial cues enhance multicellularity**

**Ella V. Ireland<sup>a</sup>, Arielle Woznica<sup>a,\*</sup> and Nicole King<sup>a,b,#</sup>**

<sup>a</sup>Department of Molecular and Cell Biology, University of California, Berkeley,

10 California, USA

<sup>b</sup>Howard Hughes Medical Institute, University of California, Berkeley, California, USA

#Address correspondence to Nicole King, [nking@berkeley.edu](mailto:nking@berkeley.edu).

\*Present address: Department of Microbiology, University of Texas Southwestern

15 Medical Center, Dallas, Texas, USA

## Abstract

Bacteria regulate the life histories of diverse eukaryotes, but relatively little is  
20 known about how eukaryotes interpret and respond to multiple bacterial cues  
encountered simultaneously. To explore how a eukaryote might respond to a  
combination of bioactive molecules from multiple bacteria, we treated the  
choanoflagellate *Salpingoeca rosetta* with two sets of bacterial cues, one that  
induces mating and the other that induces multicellular development. We found that  
25 simultaneous exposure to both sets of cues enhanced multicellular development in  
*S. rosetta*, eliciting both larger multicellular colonies and an increase in the number  
of colonies. Thus, rather than conveying conflicting sets of information, these  
distinct bacterial cues synergize to augment multicellular development. This study  
demonstrates how a eukaryote can integrate and modulate its response to cues  
30 from diverse bacteria, underscoring the potential impact of complex microbial  
communities on eukaryotic life histories.

## Importance

Eukaryotic biology is profoundly influenced by interactions with diverse  
35 environmental and host-associated bacteria. However, it is not well understood how  
eukaryotes interpret multiple bacterial cues encountered simultaneously. This  
question has been challenging to address because of the complexity of many  
eukaryotic model systems and their associated bacterial communities. Here, we  
studied a close relative of animals, the choanoflagellate *Salpingoeca rosetta*, to  
40 explore how eukaryotes respond to diverse bacterial cues. We found that a bacterial

chondroitinase that induces mating on its own can also synergize with bacterial lipids that induce multicellular “rosette” development. When encountered together, these cues enhance rosette development, resulting in the formation of more rosettes, each containing more cells than rosettes that form in the absence of the

45 chondroitinase. These findings highlight how synergistic interactions among bacterial cues can influence the biology of eukaryotes.

## Introduction

Eukaryotes, including animals and their closest living relatives, choanoflagellates, encounter abundant and diverse bacteria in the environment (1–3). However, interactions among eukaryotes and bacteria can be challenging to study in animal models due to the complex physiology of the hosts and the large number of oftentimes unculturable bacteria present, each of which releases diverse molecules (4–6). Multiple types of intestinal bacteria are required to induce full immune maturation in mice and humans, but it remains unclear whether this is due to interactions among the bacteria, or the integration by the host of multiple independent bacterial cues (7–11). The interaction of a eukaryote with multiple partners can change the magnitude or directionality of each pair-wise interaction (12), and it can be challenging to measure the functional and fitness effects of such complex networks (13). Therefore, simpler model systems may be necessary to investigate how animals and other eukaryotes integrate information from multiple bacterial cues encountered at the same time.

The choanoflagellate *Salpingoeca rosetta* can serve as a simple model for studying interactions between bacteria and eukaryotes. Like all choanoflagellates, *S. rosetta* captures bacterial prey from the water column using an apical “collar complex” composed of a microvillar collar surrounding a single flagellum (Fig. 1A; (14, 15)). In addition, like many animals (2, 16, 17), *S. rosetta* undergoes important life history transitions in response to distinct bacterial cues. For example, a secreted bacterial chondroitinase called EroS (for Extracellular Regulator of Sex) produced by *Vibrio fischeri*, *Proteus vulgaris*, and select other Gammaproteobacteria induces

70 solitary *S. rosetta* cells to gather into mating swarms (Fig. 1B; (18)). The cells in  
mating swarms are not stably adherent and eventually resolve into pairs of cells  
that mate by undergoing cell and nuclear fusion, followed by meiotic recombination.  
When exposed to a different type of bacterial cue, specific sulfonolipids called RIFs  
(for Rosette Inducing Factors) from the Bacteroidetes bacterium *Algoriphagus*  
75 *machipongonensis*, solitary cells of *S. rosetta* undergo serial rounds of cell division  
without separation, thereby resulting in the development of multicellular rosettes of  
cells (Fig. 1C) that are physically linked by cytoplasmic bridges and a shared  
extracellular matrix (19–22).

Mating and rosette development in *S. rosetta* differ in many respects, including  
80 the chemical nature of the bacterial cues (a protein versus lipids) and the underlying  
cell biology (cell aggregation versus incomplete cytokinesis). Moreover, the time  
scales of these processes differ, with mating swarms forming within 0.5 hours of  
EroS treatment (18), while definitive rosettes require multiple rounds of cell  
division and are not observed until 11 - 24 hours after exposure to RIFs (19–22).

85 Motivated by the existence of distinct *S. rosetta* life history transitions that can  
be regulated by biochemically unrelated bacterial cues, we used *S. rosetta* as a  
simple model for exploring how eukaryotes are influenced by environments filled  
with diverse bacterial cues. We investigated how *S. rosetta* responds to  
environments containing both the mating inducer EroS and the rosette-inducing  
90 RIFs. We found that the initiation of mating behavior is unchanged in the presence  
of cues that induce rosette development. In contrast, rosette development is  
significantly enhanced by the presence of the mating inducer, revealing that *S.*

*rosetta* integrates information from seemingly unrelated bacterial cues during rosette development.

95

## Results

### Rosettes swarm in response to the EroS<sub>Pv</sub> mating factor

In a culture containing *S. rosetta* and the prey bacterium *Echinicola pacifica* (together comprising a culture called SrEpac; (23, 24)), solitary cells proliferated rapidly, but underwent no other observable cell state transitions (Fig. 1A). When the SrEpac culture was treated with the secreted bacterial chondroitinase EroS from *P. vulgaris* (EroS<sub>Pv</sub>), *S. rosetta* cells formed mating swarms of 2-50 cells within 0.5 hours (Fig. 1B, Table 1), as previously reported (18). In contrast, treatment of SrEpac with *A. machipongonensis* RIFs contained in outer membrane vesicles (RIF-OMVs) induced development of multicellular rosettes within 24 hours (Fig. 1C, D, Table 1; (19, 22)).

We then tested how mature rosettes (formed in response to pre-treatment with RIF-OMVs for 24 hours) would respond to the mating inducer EroS. After treatment with EroS<sub>Pv</sub> for 0.5 hours, the pre-formed rosettes gathered into swarms that were quantifiable by their increase in area (median = 58.7  $\mu\text{m}^2$ , interquartile range = 21.6-98.0  $\mu\text{m}^2$ ) as compared to untreated rosettes (median = 35.5  $\mu\text{m}^2$ , interquartile range = 17.8-65.9  $\mu\text{m}^2$ ) (Fig. 1D-F, Table 1). Therefore, rather than being mutually exclusive, the rosette morphology induced by RIF-OMVs and the swarming behavior induced by EroS<sub>Pv</sub> are compatible. This indicates that cells in a life history stage induced by one bacterial cue (in this case RIF-OMVs) can respond to a second

bacterial cue (EroS<sub>PV</sub>). Swarms of choanoflagellate rosettes have not previously been reported, to our knowledge, and their ecological relevance is unknown.

### The mating inducer EroS<sub>PV</sub> enhances rosette development

120 We next investigated how single-celled *S. rosetta* in an SrEpac culture would respond to simultaneous exposure to EroS<sub>PV</sub> and RIF-OMVs. SrEpac cultures treated solely with RIF-OMVs for 0.5 hours, considerably less time than that required for rosette development, did not produce swarms and were indistinguishable from untreated SrEpac cultures (Fig. S1A-C', Table 1; (18, 19)). Moreover, when SrEpac  
125 cultures were treated simultaneously with EroS<sub>PV</sub> and RIF-OMVs for 0.5 hours, the cells swarmed and the culture was indistinguishable from one treated with EroS<sub>PV</sub> alone (Fig. S1A, D-E', Table 1). Therefore, RIF-OMVs do not appear to influence the swarm-inducing activity of EroS<sub>PV</sub> over time scales of 0.5 hours or less.

In contrast, when SrEpac cultures were co-treated with RIF-OMVs and EroS<sub>PV</sub> for  
130 24 hours (long enough for rosettes to develop), the percentage of cells in rosettes increased markedly compared to cultures treated with RIF-OMVs alone (Fig. 2A, Table 1). Thus, EroS<sub>PV</sub> enhances the rosette-inducing activity of RIF-OMVs. The enhancing activity of EroS<sub>PV</sub> derived, in part, from the increased sensitivity of the culture to RIF-OMVs, allowing for rosette development at RIF-OMV concentrations  
135 that would otherwise fail to elicit rosette development. For example, at a nearly 10<sup>-6</sup> dilution of RIF-OMVs, no rosettes were detected in the RIF-OMV alone condition, while 4.5±0.8% (mean ± S.D.) of the cells in cultures co-treated with EroS<sub>PV</sub> and RIF-OMVs were found in rosettes (see circle #1, Fig. 2A). In addition, when cells were

exposed to saturating concentrations of RIF-OMVs (dilutions  $\geq 3.7 \times 10^{-4}$ ), co-  
140 treatment with  $EroS_{Pv}$  increased the percentage of cells in rosettes from a maximum  
of  $83.6 \pm 6.8\%$  (mean  $\pm$  S.D.) in cultures that were treated with RIF-OMVs alone to  
 $92.6 \pm 0.3\%$  (mean  $\pm$  S.D.) in cultures co-treated with RIF-OMVs and  $EroS_{Pv}$  (see circle  
#2, Fig. 2A).

Enhancement of rosette development by the mating factor  $EroS$  was unexpected,  
145 and we next sought to understand the phenomenon in greater detail. To that end,  
we optimized a method for reproducibly inducing rosette development at low levels.  
Treating SrEpac with a 1:20,000 dilution of RIF-OMVs drove only a small percentage  
of cells (1-20%) into rosettes (Fig. 2A, Fig. S2A) and thereafter formed the basis of a  
“sensitized rosette induction assay” in which we could quantify the influence of  
150  $EroS_{Pv}$ . Under the conditions of the sensitized rosette induction assay, we found that  
 $EroS_{Pv}$  enhanced rosette development in a concentration-dependent manner that  
saturated at 0.05 U/mL (Fig. S2B). Using this sensitized rosette induction assay  
across a time series, the rosette enhancing activity of  $EroS_{Pv}$  at the population level  
became more evident (Fig. S2C). For example, while treatment of SrEpac with  
155 1:20,000 RIF-OMVs yielded only  $23.4 \pm 4.9\%$  (mean  $\pm$  S.D.) of cells in rosettes at 39-  
hours post-treatment, co-treatment with 1:20,000 RIF-OMVs and 0.05 U/mL  $EroS_{Pv}$   
yielded  $88.2 \pm 2.7\%$  (mean  $\pm$  S.D.) of cells in rosettes (Fig. 2B).

These data demonstrated that co-treatment with  $EroS_{Pv}$  increases the percentage  
of cells in rosettes at a population level but did not reveal whether  $EroS_{Pv}$ -mediated  
160 enhancement works by (1) increasing the overall number of rosettes, (2) increasing  
the average number of cells per rosette, or (3) both. To test whether co-treatment



with  $EroS_{Pv}$  increased the number of rosettes formed, we induced SrEpac with either RIF-OMVs alone or RIF-OMVs +  $EroS_{Pv}$  and measured the ratio of rosette colonies to solitary cells. Co-treatment with RIF-OMVs and  $EroS_{Pv}$  in the sensitized rosette  
165 induction assay consistently increased the ratio of rosette colonies to solitary cells throughout the time series. For example, at 39 hours post-treatment, the ratio of rosettes to solitary cells after co-treatment with RIF-OMVs and  $EroS_{Pv}$  was  $0.96 \pm 0.31$  (mean  $\pm$  S.D.), compared to  $0.06 \pm 0.02$  (mean  $\pm$  S.D.) after treatment with RIF-OMVs alone (Fig. 2C). The ratio of rosettes to solitary cells eventually plateaued,  
170 likely due to both solitary cells and rosettes (which can divide by fission (20)) dividing at the same rate. To test whether rosette size is influenced by co-treatment with  $EroS_{Pv}$ , we used the sensitized rosette induction assay to compare the number of cells per rosette in cultures treated with RIF-OMVs alone to those treated with RIF-OMVs and  $EroS_{Pv}$ . Cultures co-treated with  $EroS_{Pv}$  formed larger rosettes (with  
175  $8.9 \pm 2.7$  (mean  $\pm$  S.D.) cells per rosette colony at 39-hours post-treatment) compared with those treated with RIF-OMVs alone ( $5.3 \pm 1.7$  (mean  $\pm$  S.D.) cells per rosette colony at the same time point) (Fig. 2D). Importantly, co-treatment with  $EroS$  did not affect the growth rate or cell density of cultures (Fig. S2D), indicating that the increase in cell number per rosette was not due to a difference in cell division rates.  
180 Therefore, at limiting concentrations of RIF-OMVs,  $EroS_{Pv}$  enhances the rosette-inducing activity of RIF-OMVs in at least two ways: at the population level, by increasing sensitivity to RIFs and the number of cells that initiate rosette development, and at the level of development, by increasing the maximal size of rosettes.

185

### Purified RIFs and EroS are sufficient for enhancement of rosette induction

Because *A. machipongonensis* OMVs contain a suite of proteins, sugars, the sulfonolipid RIFs, and diverse other lipids, we next explored whether RIFs are sufficient for EroS<sub>Pv</sub>-mediated enhancement of rosette development or whether the  
190 phenomenon requires a non-RIF. For example, certain lysophosphatidylethanolamines (LPEs), lipids found alongside RIFs in *A. machipongonensis* OMVs, synergize with RIFs and enhance rosette induction, in part by increasing the resistance of larger rosettes to shear forces (22).

To test whether EroS<sub>Pv</sub> acts synergistically with RIFs or requires other  
195 components of RIF-OMVs, we compared rosette development in SrEpac cultures treated with high-performance liquid chromatography (HPLC)-purified RIFs (19, 22) with that in cultures co-treated with HPLC-purified RIFs and EroS<sub>Pv</sub>. Co-treatment with EroS<sub>Pv</sub> and purified RIFs caused a significant increase in the percentage of cells in rosettes compared to purified RIFs alone, indicating that the  
200 enhancement does not require other components of *A. machipongonensis* OMVs (Fig. 3A). Moreover, enhancement of rosette development was not restricted to *P. vulgaris* EroS. Co-treatment with purified *V. fischeri* EroS (EroS<sub>Vf</sub>) also significantly enhanced RIF-OMV-induced rosette development (Fig. 3B), revealing that the enhancing activity likely stems from the chondroitinase activity conserved between  
205 EroS<sub>Vf</sub> and EroS<sub>Pv</sub> rather than from a lineage-specific feature found only in EroS<sub>Pv</sub>. These findings show that simultaneous exposure to just two bacterial cues, RIFs and EroS, is sufficient to induce enhanced development of rosettes in *S. rosetta*.

## Discussion

210 We have shown here that the choanoflagellate *S. rosetta* can sense and respond  
to a mix of bacterial cues, each of which in isolation induces a seemingly disparate  
life history transition – mating or multicellularity. Together, these cues enhance  
multicellular development, increasing the number of cells in rosettes at a population  
level by increasing the proportion of rosettes to single cells and by increasing the  
215 number of cells per rosette (Fig. 2 and 4).

The *S. rosetta* targets for EroS and the sulfonolipid RIFs are as-yet unknown (18,  
19), making it challenging to infer the specific mechanisms by which EroS might  
enhance rosette development. One possibility is that EroS may modify chondroitin  
sulfate proteoglycans through its chondroitinase activity, thereby improving access  
220 of RIF receptors to RIFs, potentially explaining the increased sensitivity of EroS-  
treated *S. rosetta* to RIF-OMVs (Fig. 2A). This type of mechanism would resemble the  
regulation of vascular endothelial growth factor receptor 2 (VEGFR2), whose  
activity is inhibited by *N*-glycosylation; enzymatic digestion of glycans on VEGFR2  
enhances its response to the VEGF ligand (25).

225 In addition to increasing the sensitivity of *S. rosetta* to RIF-OMVs, EroS treatment  
also resulted in rosettes that contained more cells (Fig. 2D). A link between rosette  
size and extracellular matrix (ECM) modification was previously reported for  
another colony-forming choanoflagellate, *Salpingoeca helianthica*, in which  
treatment with a bovine chondroitinase resulted in a significantly increased number  
230 of cells per rosette (26). Furthermore, chemical perturbations of the *S. rosetta* ECM

and computational modeling have shown that the material properties of the ECM, such as stiffness and volume, exert a physical constraint on rosette volume and morphology (27). Thus, EroS digestion of chondroitin sulfate in the *S. rosetta* ECM may relax these constraints and allow for increased proliferation of cells within

235 rosettes.

Might *S. rosetta* in nature actually encounter the disparate types of bacteria that induce multicellularity and mating? Rosette development can be induced by diverse genera of marine bacteria, ranging from *A. machipongonensis*, which was co-isolated with *S. rosetta*, to *Zobellia uliginosa*, a macroalgal commensal (19, 28, 29). Likewise, mating can be induced by diverse *Vibrio* species (18), which are widespread in marine environments (30, 31). Moreover, the bioactive molecules produced by *A. machipongonensis* and *V. fischeri* (sulfonolipid RIFs and EroS) are secreted and are potent at ecologically relevant concentrations (femtomolar to nanomolar) that are comparable to those of other soluble marine signaling molecules (2, 18, 19, 22).

245 Taken together, the diversity and abundance of rosette-inducing and mating-inducing bacteria, and the potency of the molecules they produce, argue that RIFs and EroS could be simultaneously encountered by *S. rosetta* in nature. The synergy between these cues allows *S. rosetta* to sense and respond to significantly lower concentrations of rosette-inducing factors than it could otherwise (Fig. 2A), contributing to the plausibility that the enhanced rosette induction they elicit could be ecologically relevant.

250

Simple host-microbe interactions, in which a single bacterium elicits a clear phenotype from a eukaryotic host, have begun to reveal the molecular mechanisms

by which bacteria influence the biology of eukaryotes. For example, *V. fischeri*  
255 colonizes and is sufficient to induce the development of the light organ in the bobtail  
squid, but this process only happens through the integration of multiple cues  
produced by *V. fischeri* – peptidoglycan and lipopolysaccharide (32). Likewise, we  
have previously shown that two types of molecules – sulfonolipid RIFs and specific  
LPEs – are necessary to recapitulate the rosette-inducing activity of live *A.*  
260 *machipongonensis* (22). Thus, interactions that are seemingly simple at the  
organismal level – one bacterium and one eukaryote – can require complex  
interactions at the molecular level.

Given the underlying molecular complexity of interactions involving only one  
bacterium and one eukaryote, interactions among larger numbers of species are,  
265 perhaps unsurprisingly, complex and can yield a variety of outcomes, including  
synergistic effects (12). For example, arbuscular mycorrhizal fungi and rhizobia  
bacteria individually confer beneficial effects on plants, and the simultaneous  
presence of both groups in a tripartite association enhances these effects, increasing  
plant biomass to a greater extent than each partner could alone (33). Synergistic  
270 effects have also been demonstrated in interactions among eukaryotes and multiple  
bacterial species, such as in polymicrobial infections. Direct interactions among  
pathogens in polymicrobial infections (through metabolite exchange, signaling  
molecules, or direct contact) can synergistically increase the disease burden for the  
host (such as by increasing antibiotic resistance or virulence factor expression)  
275 (34). Eukaryotic integration of bacterial cues has also been observed in the  
mammalian immune system, in which immune receptors such as Toll-like receptors,

T cell receptors and co-receptors, each of which recognizes different bacterial ligands, synergize to enhance the response to multiple bacterial cues (35, 36).

Our finding that isolated cues from diverse environmental bacteria can synergize  
280 to enhance rosette development in *S. rosetta* (Fig. 3) demonstrates that this type of  
integration can occur at the level of the eukaryote, without requiring direct  
interactions among environmental bacteria. In the future, identifying the *S. rosetta*  
target(s) of RIF and EroS activity will likely provide detailed insights into the  
molecular mechanisms underlying EroS-mediated enhancement of rosette  
285 development. The experimental tractability of *S. rosetta* and its susceptibility to the  
influences of environmental bacteria render it an exciting system in which to  
investigate the mechanisms by which eukaryotes grapple with a noisy and  
information-rich bacterial world.

## Materials and Methods

290

### Choanoflagellate culturing conditions

Artificial seawater (ASW) was prepared by diluting 32.9 g Tropic Marin sea salts in 1L water for a salinity of 32-37 parts per thousand (24). Sea Water Complete media (SWC) was prepared by diluting 5 g/L peptone, 3 g/L yeast extract, and 3 mL/L glycerol in ASW (24). SrEpac (*Salpingoeca rosetta* co-cultured with the prey bacterium *Echinicola pacifica*, ATCC PRA-390; (24)) was cultured in 5% Sea Water Complete media (5% SWC vol/vol in ASW) at 22°C. Cultures were passaged daily, 1 mL into 9 mL fresh media in 25cm<sup>2</sup> cell culture flasks (Corning). Prior to rosette or swarm induction, cultures were diluted to 1×10<sup>5</sup> choanoflagellate cells/mL in 5% SWC and 100 µL volumes were aliquoted into a 96-well plate (Corning).

295

300

### Preparation of *A. machipongonensis* conditioned media and isolation of RIF-OMVs

Outer membrane vesicles were isolated from *A. machipongonensis* as described in (22). Briefly, *A. machipongonensis* (ATCC BAA-2233, (28)) was grown in 500 mL 100% SWC, shaking at 30°C for 48 hours. The bacteria were pelleted and the supernatant was filtered through a 0.2 µm filter to produce conditioned media. Conditioned media was then centrifuged at 36,000 × g for 3 hours at 4°C (Type 45 Ti rotor, Beckman Coulter). OMV-containing pellets were resuspended in 2 mL ASW.

305

310

### HPLC purification of RIFs

RIFs were purified by HPLC as described in (22). Briefly, *A. machipongonensis* was grown in 20 L Marine Broth media (Carl Roth (CP.73): 40.1 g/L), shaking at 30°C for 48 hours. The cells were harvested by centrifugation and extracted with CHCl<sub>3</sub>:MeOH (2:1, 4L). The organic extract was filtered and concentrated to give approximately 3g crude lipid extract. The crude extract was dissolved in 60% MeOH (+0.1% NH<sub>4</sub>OH) and fractionated using a C18-SPE (Solid Phase Extraction) using a 10% step-gradient of MeOH (60%-100% MeOH+0.1 NH<sub>4</sub>OH). The resulting SPE fractions were analyzed for sulfonolipid-specific signals using LC-MS and <sup>1</sup>H-NMR. The fraction containing RIF-mix (RIF-1 and RIF-2) eluted with 90% MeOH (+0.1% NH<sub>4</sub>OH) during the SPE purification.

### Rosette induction

Unless otherwise noted, SrEpac cultures were treated with a 1:1,000 dilution of RIF-OMVs and incubated for 24 hours before imaging or counting. To induce a low level of rosette development in the sensitized rosette induction assay (Fig. 2B-D, Fig. 3B, Fig. S2B-D), SrEpac cultures were treated with a 1:20,000 dilution of RIF-OMVs. HPLC-purified RIFs were resuspended in DMSO and added at 10 µg/mL (Fig. 3A).

### Swarm induction

Unless otherwise noted, cultures were treated with 0.05 U/mL chondroitinase ABC from *P. vulgaris* (Sigma), referred to as “EroS<sub>Pv</sub>”. EroS from *V. fischeri* (EroS<sub>Vf</sub>; Fig. 3B) was purified as described in (18). Briefly, *V. fischeri* ES114 (ATCC 700601) was grown in 8 L 100% SWC, shaking at 20°C for 30 hours. The bacteria were pelleted



and the supernatant was filtered through a 0.2  $\mu\text{m}$  filter, concentrated to 120 mL

335 using a using a tangential flow filtration device with a 30 kDa Centramate filter (Pall #OS030T12), then ammonium sulfate precipitated and further separated by size exclusion chromatography. EroS<sub>vf</sub> was added to SrEpac cultures at a final dilution of 0.1%.

#### 340 Rosette quantification

To quantify the percentage of cells in rosettes, cultures were fixed with 1% formaldehyde, vortexed, mounted on a Bright-Line hemacytometer (Hausser Scientific), and counted on a Leica DMI6000B inverted compound microscope.

Rosettes were defined as groups of four or more cells, and were distinguished from  
345 swarms based on their resistance to mechanical shear and their stereotypical orientation with their basal poles pointed inwards and their flagella out (20, 23).

The numbers of solitary cells and rosettes, as well as the number of cells in each rosette, were counted until at least 200 cells were scored (per biological replicate).

#### 350 Swarm quantification

Cell cluster areas were quantified as described in (18). Briefly, samples were imaged in 96-well glass-bottomed plates (Ibidi 89621) at 10 $\times$  magnification using transmitted light (bright field) on a Zeiss Axio Observer.Z1/7 Widefield microscope with a Hamamatsu Orca-Flash 4.0 LT CMOS Digital Camera. Images were processed

355 and analyzed in ImageJ as follows: 'Smooth' to reduce bacterial background, 'Find Edges' to further highlight choanoflagellate cells, 'Make Binary' to convert to black

and white, 'Close-' to fill in small holes, and 'Analyze Particles' to calculate the area of each cell cluster. Particles smaller than  $10 \mu\text{m}^2$  were removed to reduce background bacterial signal.

360 **Acknowledgements**

This material is based upon work originally supported by the National Institutes of Health (R01-GM099533 to N.K.). We thank members of the King lab for critical feedback, especially David Booth, Thibaut Brunet and Ben Larson. We thank Christine Beemelmans and Chia-Chi Peng for providing HPLC-purified RIFs, Zoe  
365 Vernon and Olivia Angiuli for statistics consultation, and Debbie Maizels for help with illustrations in Fig. 4.

## References

1. McFall-Ngai MJ. 2002. Unseen forces: The influence of bacteria on animal development. *Dev Biol* 242:1–14.
- 370 2. Woznica A, King N. 2018. Lessons from simple marine models on the bacterial regulation of eukaryotic development. *Curr Opin Microbiol* 43:108–116.
3. McFall-Ngai M, Hadfield MG, Bosch TCG, Carey H V, Domazet-Lošo T, Douglas AE, Dubilier N, Eberl G, Fukami T, Gilbert SF, Hentschel U, King N, Kjelleberg S, Knoll AH, Kremer N, Mazmanian SK, Metcalf JL, Nealson K, Pierce NE, Rawls JF, 375 Reid A, Ruby EG, Rumpho M, Sanders JG, Tautz D, Wernegreen JJ. 2013. Animals in a bacterial world, a new imperative for the life sciences. *Proc Natl Acad Sci* 110:3229–3236.
4. Eckburg PB, Bik EM, Bernstein CN, Purdom E, Dethlefsen L, Sargent M, Gill SR, Nelson KE, Relman DA. 2005. Diversity of the human intestinal microbial 380 flora. *Science* 308:1635–1638.
5. Lozupone CA, Stombaugh JI, Gordon JI, Jansson JK, Knight R. 2012. Diversity, stability and resilience of the human gut microbiota. *Nature* 489:220–230.
6. Donia MS, Fischbach MA. 2015. Small molecules from the human microbiota. *Science* 349:1254766.
- 385 7. Tanoue T, Morita S, Plichta DR, Skelly AN, Suda W, Sugiura Y, Narushima S, Vlamakis H, Motoo I, Sugita K, Shiota A, Takeshita K, Yasuma-Mitobe K,

- Riethmacher D, Kaisho T, Norman JM, Mucida D, Suematsu M, Yaguchi T, Bucci V, Inoue T, Kawakami Y, Olle B, Roberts B, Hattori M, Xavier RJ, Atarashi K, Honda K. 2019. A defined commensal consortium elicits CD8 T cells and anti-cancer immunity. *Nature* 565:600–605.
- 390
8. Atarashi K, Tanoue T, Oshima K, Suda W, Nagano Y, Nishikawa H, Fukuda S, Saito T, Narushima S, Hase K, Kim S, Fritz J V, Wilmes P, Ueha S, Matsushima K, Ohno H, Olle B, Sakaguchi S, Taniguchi T, Morita H, Hattori M, Honda K. 2013. Treg induction by a rationally selected mixture of Clostridia strains from the human microbiota. *Nature* 500:232–236.
- 395
9. Bouskra D, Brézillon C, Bérard M, Werts C, Varona R, Boneca IG, Eberl G. 2008. Lymphoid tissue genesis induced by commensals through NOD1 regulates intestinal homeostasis. *Nature* 456:507–510.
10. Martin R, Nauta AJ, Ben Amor K, Knippels LMJ, Knol J, Garssen J. 2010. Early life: Gut microbiota and immune development in infancy. *Benef Microbes* 1:367–382.
- 400
11. Chung H, Pamp SJ, Hill JA, Surana NK, Edelman SM, Troy EB, Reading NC, Villablanca EJ, Wang S, Mora JR, Umesaki Y, Mathis D, Benoist C, Relman DA, Kasper DL. 2012. Gut immune maturation depends on colonization with a host-specific microbiota. *Cell* 149:1578–1593.
- 405
12. Afkhami ME, Rudgers JA, Stachowicz JJ. 2014. Multiple mutualist effects: conflict and synergy in multispecies mutualisms. *Ecology* 95:833–844.

13. Mushegian AA, Ebert D. 2016. Rethinking “mutualism” in diverse host-symbiont communities. *BioEssays* 38:100–108.
- 410 14. Dayel MJ, King N. 2014. Prey Capture and Phagocytosis in the Choanoflagellate *Salpingoeca rosetta*. *PLoS One* 9:e95577.
15. Leadbeater BSC. 2015. The collared flagellate: functional morphology and ultrastructure, p. 18–43. *In* *The Choanoflagellates*. Cambridge University Press, Cambridge.
- 415 16. Tebben J, Tapiolas DM, Motti CA, Abrego D, Negri AP, Blackall LL, Steinberg PD, Harder T. 2011. Induction of Larval Metamorphosis of the Coral *Acropora millepora* by Tetrabromopyrrole Isolated from a *Pseudoalteromonas* Bacterium. *PLoS One* 6:e19082.
17. Shikuma NJ, Pilhofer M, Weiss GL, Hadfield MG, Jensen GJ, Newman DK. 2014. Marine Tubeworm Metamorphosis Induced by Arrays of Bacterial Phage Tail-Like Structures. *Science* 343:529–533.
- 420 18. Woznica A, Gerdt JP, Hulett RE, Clardy J, King N. 2017. Mating in the closest living relatives of animals is induced by a bacterial chondroitinase. *Cell* 170:1–9.
- 425 19. Alegado RA, Brown LW, Cao S, Dermenjian RK, Zuzow R, Fairclough SR, Clardy J, King N. 2012. A bacterial sulfonolipid triggers multicellular development in the closest living relatives of animals. *eLife* 1:e00013.

20. Dayel MJ, Alegado RA, Fairclough SR, Levin TC, Nichols SA, McDonald K, King N. 2011. Cell differentiation and morphogenesis in the colony-forming  
430 choanoflagellate *Salpingoeca rosetta*. *Dev Biol* 357:73–82.
21. Fairclough SR, Dayel MJ, King N. 2010. Multicellular development in a choanoflagellate. *Curr Biol* 20:R875–R876.
22. Woznica A, Cantley AM, Beemelmanns C, Freinkman E, Clardy J, King N. 2016. Bacterial lipids activate, synergize, and inhibit a developmental switch in  
435 choanoflagellates. *Proc Natl Acad Sci* 113:7894–7899.
23. Levin TC, Greaney AJ, Wetzel L, King N. 2014. The *rosetteless* gene controls development in the choanoflagellate *S. rosetta*. *eLife* 3:e04070.
24. Levin TC, King N. 2013. Evidence for sex and recombination in the choanoflagellate *Salpingoeca rosetta*. *Curr Biol* 23:2176–2180.
- 440 25. Chandler KB, Leon DR, Kuang J, Meyer RD, Rahimi N, Costello CE. 2019. N-glycosylation regulates ligand-dependent activation and signaling of vascular endothelial growth factor receptor 2 (VEGFR2). *J Biol Chem* jbc.RA119.008643.
26. Richter DJ, Fozouni P, Eisen MB, King N. 2017. The ancestral animal genetic  
445 toolkit revealed by diverse choanoflagellate transcriptomes. *bioRxiv* <http://dx.doi.org/10.1101/211789>.
27. Larson BT, Ruiz-Herrero T, Lee S, Kumar S, King N. 2019. Biophysical

principles of choanoflagellate self-organization. bioRxiv

<http://dx.doi.org/10.1101/659698>.

- 450 28. Alegado RA, Grabenstatter JD, Zuzow R, Morris A, Huang SY, Summons RE,  
King N. 2013. *Algoriphagus machipongonensis* sp. nov., co-isolated with a  
colonial choanoflagellate. *Int J Syst Evol Microbiol* 63:163–168.
29. Matsuo Y, Suzuki M, Kasai H, Shizuri Y, Harayama S. 2003. Isolation and  
phylogenetic characterization of bacteria capable of inducing differentiation  
455 in the green alga *Monostroma oxyspermum*. *Environ Microbiol* 5:25–35.
30. Grimes DJ, Johnson CN, Dillon KS, Flowers AR, Noriea NF, Berutti T. 2009.  
What genomic sequence information has revealed about *Vibrio* ecology in the  
ocean. *Microb Ecol* 58:447–460.
31. Takemura AF, Chien DM, Polz MF. 2014. Associations and dynamics of  
460 Vibrionaceae in the environment, from the genus to the population level.  
*Front Microbiol* 5:1–26.
32. Koropatnick TA, Engle JT, Apicella MA, Stabb E V., Goldman WE, McFall-Ngai  
MJ. 2004. Microbial factor-mediated development in a host-bacterial  
mutualism. *Science* 306:1186–1188.
- 465 33. van der Heijden MG, Bruin S De, Luckerhoff L, van Logtestijn RS, Schlaeppi K.  
2016. A widespread plant-fungal-bacterial symbiosis promotes plant  
biodiversity, plant nutrition and seedling recruitment. *ISME J* 10:389–399.



34. Murray JL, Connell JL, Stacy A, Turner KH, Whiteley M. 2014. Mechanisms of synergy in polymicrobial infections. *J Microbiol* 52:188–199.
- 470 35. Trinchieri G, Sher A. 2007. Cooperation of Toll-like receptor signals in innate immune defence. *Nat Rev Immunol* 7:179–190.
36. Kroczek RA, Mages HW, Hutloff A. 2004. Emerging paradigms of T-cell co-stimulation. *Curr Opin Immunol* 16:321–327.

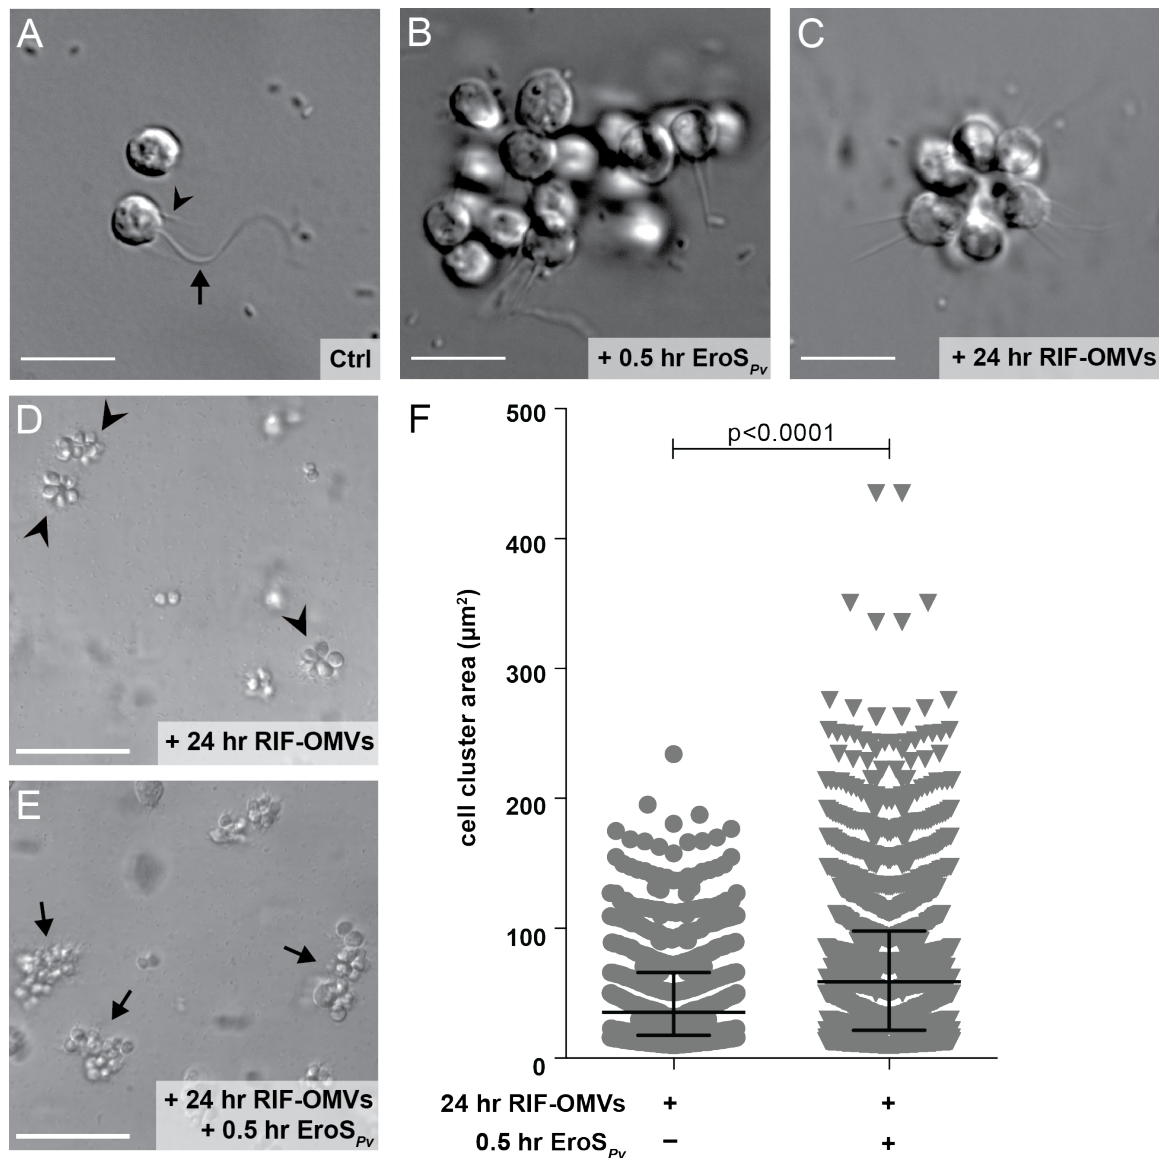

475 **Figure 1: Rosettes swarm in response to the EroS<sub>Pv</sub> mating factor**

(A-C) Bacterial cues regulate mating and multicellularity in *S. rosetta*. Scale bars = 10 μm. (A) *S. rosetta* grown in the presence of the prey bacterium *E. pacifica* ("Ctrl") proliferated as solitary cells. This culture served as the foundation for all experiments in this study. A typical *S. rosetta* cell has an apical collar (arrowhead) surrounding a single flagellum (arrow). (B) *S. rosetta* formed mating swarms within 480 0.5 hours of treatment with the bacterially-produced chondroitinase EroS<sub>Pv</sub>. (C) *S.*

*rosetta* solitary cells developed into rosettes through serial rounds of cell division within 24 hours of treatment with RIF-OMVs from the bacterium *A.*

*machipongonensis*. (D-E) Rosettes swarm in the presence, but not in the absence, of

485 *EroS<sub>Pv</sub>*. Scale bars = 50  $\mu\text{m}$ . (D) After 24 hours of treatment with RIF-OMVs, solitary cells in an SrEpac culture developed into rosettes (arrowheads) but did not swarm.

(E) Swarms of rosettes (arrows) formed after 24 hours of treatment with RIF-OMVs followed by 0.5 hours of treatment with *EroS<sub>Pv</sub>*. (F) Shown are the surface areas of

cell clusters from SrEpac cultures treated with RIF-OMVs for 24 hours followed by

490 0.5 hours of incubation either with or without *EroS<sub>Pv</sub>*. Following the approach of (18), we generated a binary mask to measure cell cluster area (the area of each cell, rosette, or swarm; Fig. S1). *EroS<sub>Pv</sub>* treatment resulted in clusters of cells, including

swarms of rosettes (median = 58.7  $\mu\text{m}^2$ , interquartile range = 21.6-98.0  $\mu\text{m}^2$ ), whose areas were significantly larger than those measured in the rosette-only control

495 (median = 35.5  $\mu\text{m}^2$ , interquartile range = 17.8-65.9  $\mu\text{m}^2$ ) (Kolmogorov-Smirnov test). 875 cell cluster areas were plotted for the cultures treated with RIF-OMVs and 1359 cell cluster areas were plotted for the cultures treated with RIF-OMVs + *EroS<sub>Pv</sub>*.

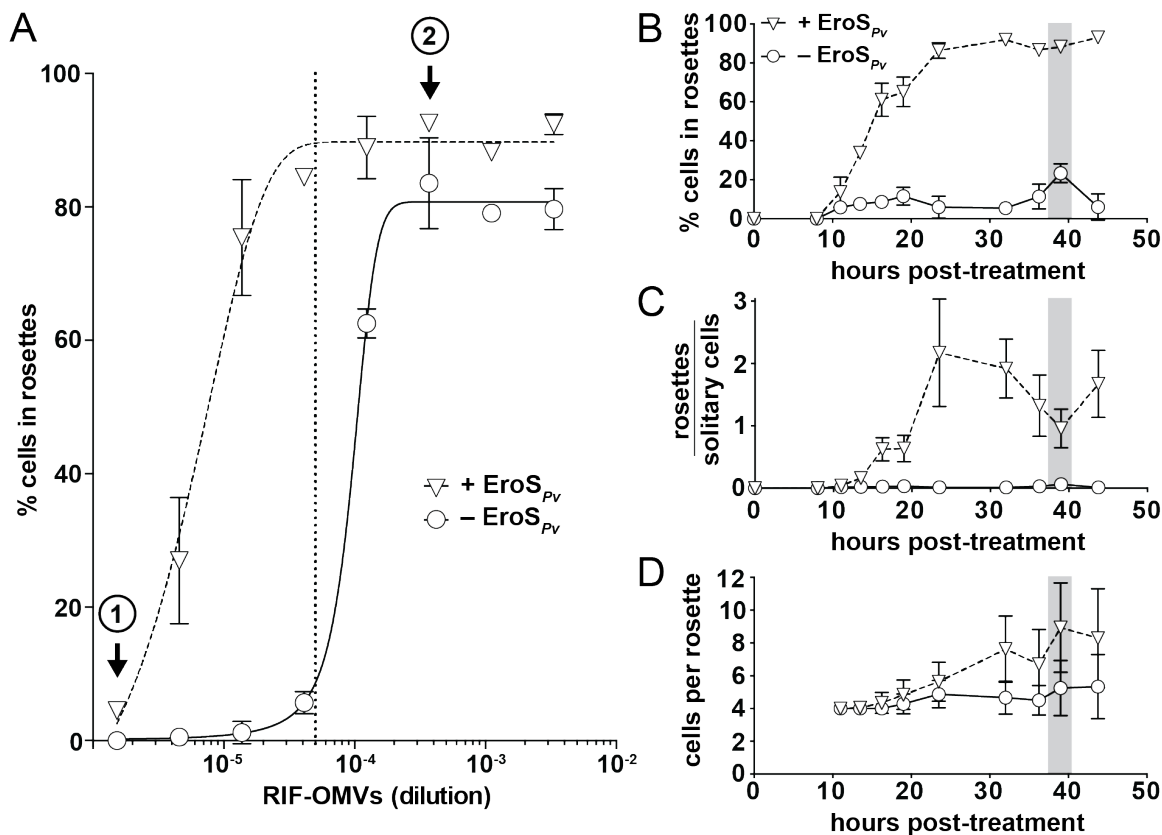

**Figure 2: The mating inducer EroS<sub>Pv</sub> enhances rosette development**

(A) EroS<sub>Pv</sub> enhances rosette induction by RIF-OMVs. Treatment of SrEpac with increasing concentrations of RIF-OMVs (circles) resulted in a concomitant increase in the percentage of cells in rosettes. Co-treatment of SrEpac with RIF-OMVs and 0.05 U/mL EroS<sub>Pv</sub> (triangles) resulted in rosette development at concentrations of RIF-OMVs that did not otherwise induce rosettes (e.g. at (1)). EroS<sub>Pv</sub> also increased the maximum percentage of cells in rosettes at saturating concentrations of RIF-OMVs (e.g. at (2)). The 1:20,000 dilution of RIF-OMVs used for the sensitized rosette induction assays in panels B-D is indicated with a vertical dotted line. Mean plotted ± S.D. (B) Co-treatment of SrEpac with EroS<sub>Pv</sub> and RIF-OMVs leads to a dramatic increase in percentage of cells in rosettes throughout the course of rosette

development relative to SrEpac treated only with RIF-OMVs. After 39 hours (shaded  
510 bar) of co-treatment with RIF-OMVs and EroS<sub>Pv</sub> (triangles), 88.2±2.7% (mean ± S.D.)  
of *S. rosetta* cells were in rosettes, compared with 23.4±4.9% (mean ± S.D.) of cells  
treated with RIF-OMVs alone (circles). (C) EroS<sub>Pv</sub> increased the ratio of rosettes to  
solitary cells in SrEpac cultures treated with RIF-OMVs. After 39 hours (shaded bar)  
of co-treatment with RIF-OMVs and EroS<sub>Pv</sub> (triangles), the ratio of rosettes to  
515 solitary cells was 0.96±0.31 (mean ± S.D.), compared with 0.06±0.02 (mean ± S.D.)  
after treatment with RIF-OMVs alone (circles). (D) EroS<sub>Pv</sub> increased the number of  
cells per rosette in RIF-OMV-treated SrEpac cultures. After 39 hours (shaded bar) of  
co-treatment with RIF-OMVs and EroS<sub>Pv</sub> (triangles), there were 8.9±2.7 (mean ±  
S.D.) *S. rosetta* cells per rosette colony, compared with 5.3±1.7 (mean ± S.D.) cells  
520 per rosette colony after treatment with RIF-OMVs alone (circles).

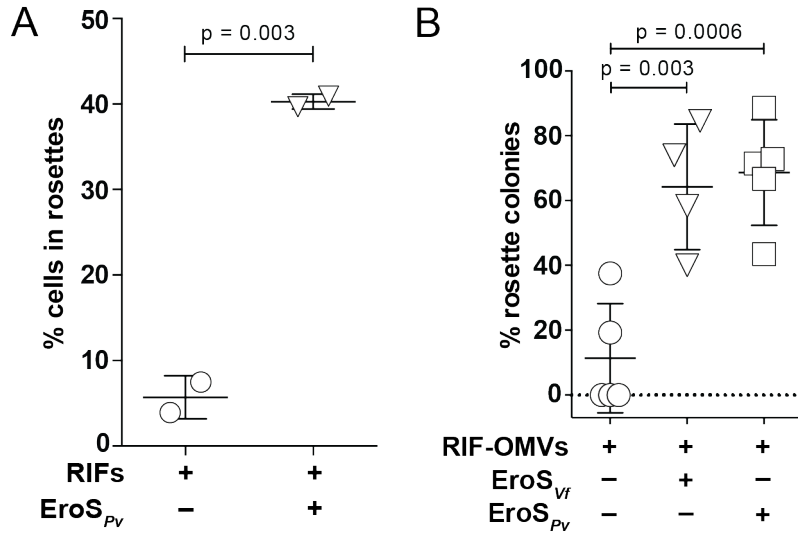

**Figure 3: Purified RIFs and EroS are sufficient for enhancement of rosette induction**

(A) Co-treatment of SrEpac with 10 µg/mL HPLC-purified RIFs and 0.05 U/mL EroS<sub>Pv</sub> (triangles) resulted in an increase in the percentage of *S. rosetta* cells in rosettes compared to treatment with HPLC-purified RIFs alone (circles). Mean plotted ± S.D. (unpaired *t* test). (B) Co-treatment of SrEpac with a 1:20,000 dilution of RIF-OMVs and either 0.1% EroS from *V. fischeri* (EroS<sub>Vf</sub>), or 0.05 U/mL EroS from *P. vulgaris* (EroS<sub>Pv</sub>) resulted in an increase in the percentage of rosette colonies compared to treatment with RIF-OMVs alone. Mean plotted ± S.D. (unpaired *t* test).

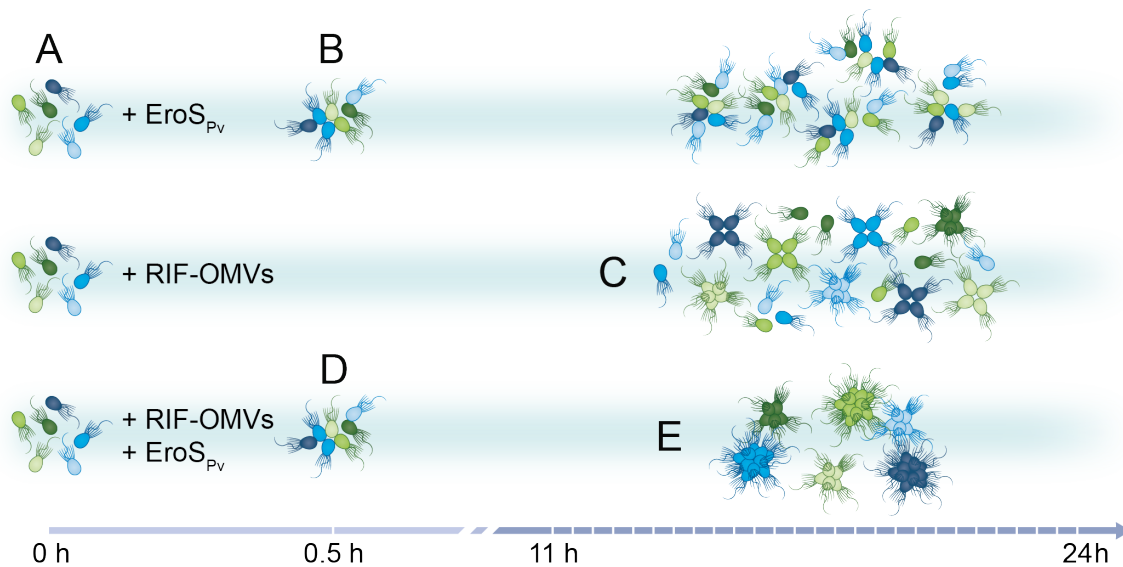

530 **Figure 4: *S. rosetta* integration of bacterial cues**

*S. rosetta* phenotypes induced over time by EroS<sub>Pv</sub>, RIF-OMVs, and the synergistic effect of both cues. (A) Untreated SrEpac proliferates as solitary cells. (B) Treatment with EroS<sub>Pv</sub> induces swarming of unrelated cells within 0.5 hours. (C) Treatment with RIF-OMVs induces rosette development through cell division within 11-24 hours. (D) Co-treatment with RIF-OMVs and EroS<sub>Pv</sub> for 0.5 hours results in swarming, showing that RIF-OMVs do not interfere with or enhance the activity of EroS<sub>Pv</sub>. (E) After 11-24 hours of co-treatment with RIF-OMVs and EroS<sub>Pv</sub>, rosettes develop and swarm. Compared to treatment with RIF-OMVs alone, co-treatment with RIF-OMVs and EroS<sub>Pv</sub> induces the development of more rosettes and rosettes containing more cells.

535  
540

**Table 1: *S. rosetta* phenotypes induced by EroS<sub>PV</sub> and RIF-OMVs**

| <b>Bacterial cue</b>          | <b>Hours after induction</b> | <b><i>S. rosetta</i> phenotype</b> | <b>Effect on swarming</b> | <b>Effect on rosette development</b> |
|-------------------------------|------------------------------|------------------------------------|---------------------------|--------------------------------------|
| EroS <sub>PV</sub>            | 0.5                          | swarming                           | induces                   | n/a                                  |
| RIF-OMVs                      | 0.5                          | solitary                           | none                      | n/a                                  |
| EroS <sub>PV</sub> + RIF-OMVs | 0.5                          | swarming                           | induces                   | n/a                                  |
| EroS <sub>PV</sub>            | 24                           | swarming                           | induces                   | none                                 |
| RIF-OMVs                      | 24                           | rosette                            | none                      | induces                              |
| EroS <sub>PV</sub> + RIF-OMVs | 24                           | rosette + swarming                 | induces                   | enhances                             |



## SUPPLEMENTAL MATERIAL

545

### **Synergistic cues from diverse bacteria enhance multicellular development in a choanoflagellate**

**Ella V. Ireland<sup>a</sup>, Arielle Woznica<sup>a,\*</sup> and Nicole King<sup>a,b,#</sup>**

550

<sup>a</sup>Department of Molecular and Cell Biology, University of California, Berkeley, California, USA

<sup>b</sup>Howard Hughes Medical Institute, University of California, Berkeley, California, USA

555 #Address correspondence to Nicole King, [nking@berkeley.edu](mailto:nking@berkeley.edu).

\*Present address: Department of Microbiology, University of Texas Southwestern Medical Center, Dallas, Texas, USA

560

565

570

575

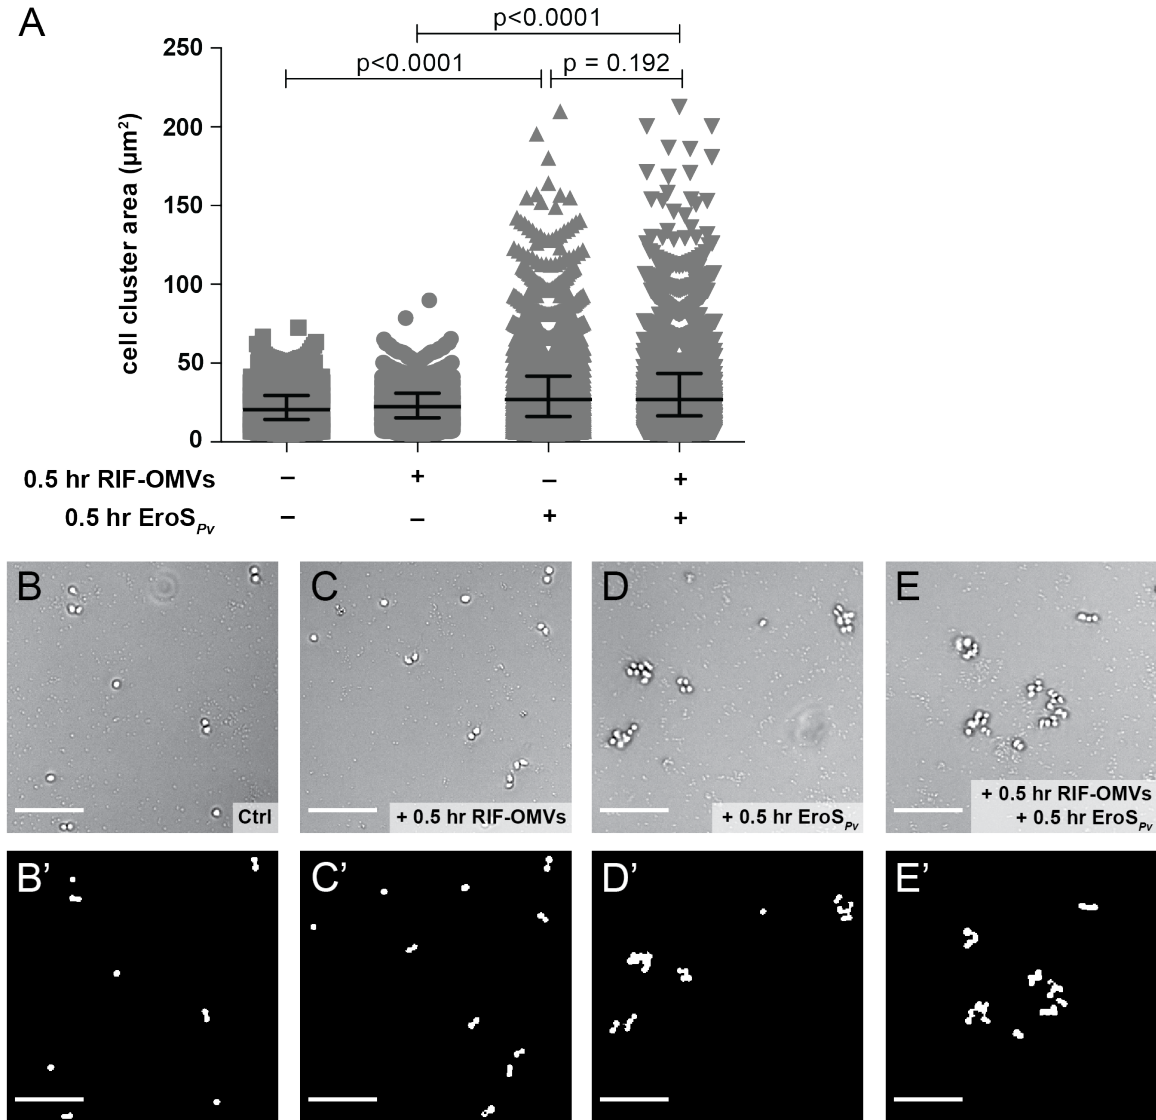

**Figure S1: RIF-OMVs have no effect on EroS<sub>Pv</sub>-induced swarming**

(A) Solitary cells from SrEpac co-treated with RIF-OMVs and EroS<sub>Pv</sub> formed swarms, quantifiable by an increase in cell cluster area (median = 27.0 µm<sup>2</sup>, interquartile range = 16.5-43.5 µm<sup>2</sup>) compared to cells treated with RIF-OMVs alone (median = 22.4 µm<sup>2</sup>, interquartile range = 15.2-30.8 µm<sup>2</sup>). There was no significant difference in swarm size between cells co-treated with RIF-OMVs and EroS<sub>Pv</sub> and cells treated with EroS<sub>Pv</sub> alone (median = 27.0 µm<sup>2</sup>, interquartile range = 16.0-41.8 µm<sup>2</sup>)

(Kolmogorov-Smirnov test). A minimum of 2730 cell cluster areas were plotted for  
585 each condition. (B-E') Sample images used for quantification in (A). Following the  
approach of (18), raw images in (B-E) were converted to binary images (B'-E') to  
measure cell cluster size (Materials and Methods). (B) *S. rosetta* cells from untreated  
SrEpac remained solitary. (C) *S. rosetta* cells from SrEpac treated with RIF-OMVs for  
0.5 hours remained solitary. (D) *S. rosetta* cells from SrEpac treated with EroS<sub>PV</sub> for  
590 0.5 hours formed visible swarms. (E) *S. rosetta* cells from SrEpac co-treated with  
RIF-OMVs and EroS<sub>PV</sub> for 0.5 hours formed visible swarms.

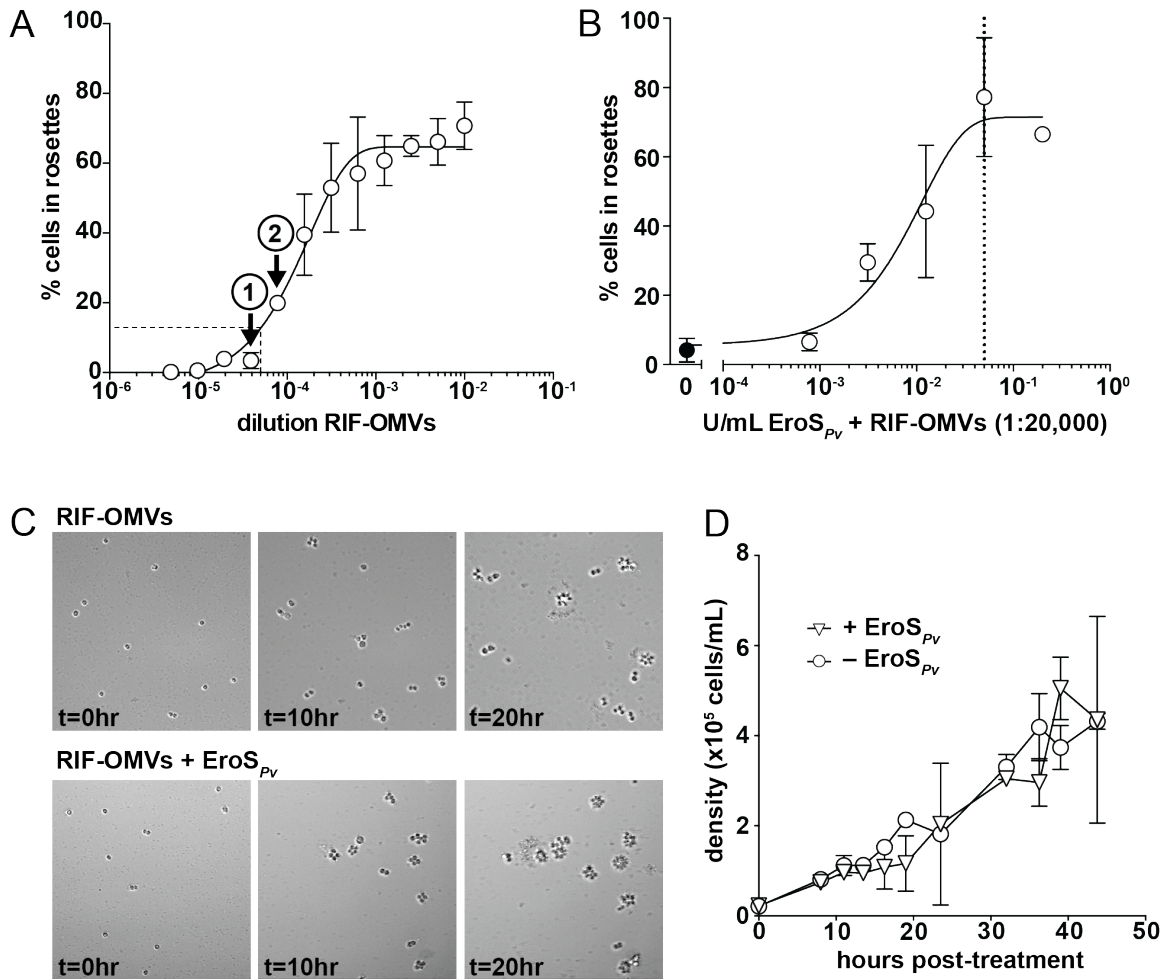

**Figure S2: EroS<sub>PV</sub> enhances rosette development, but not cell proliferation, in a sensitized rosette induction assay**

595 (A) Serial dilution of RIF-OMVs can be used to induce a low percentage of cells in rosettes. SrEpac treated with a 1:25,600 dilution of RIF-OMVs resulted in 3.4±2.3 (mean ± S.D.) *S. rosetta* cells in rosettes (arrow marked (1)), while a 1:12,800 dilution of RIF-OMVs resulted in 19.9±1.7 (mean ± S.D.) *S. rosetta* cells in rosettes (arrow marked (2)). An intermediate dilution of 1:20,000 was used for the  
600 sensitized rosette induction assay (dashed lines). (B) Rosette-enhancing activity

correlated with  $EroS_{Pv}$  concentration. SrEpac treated with a 1:20,000 dilution of RIF-OMVs (black circle) contained more *S. rosetta* cells in rosettes upon the addition of increasing concentrations of  $EroS_{Pv}$  (white circles). Dotted line indicates concentration of  $EroS_{Pv}$  (0.05 U/mL) used for subsequent assays. Mean plotted  $\pm$  S.D.

605 (C) Time-lapse imaging showed an increase in both the number of rosettes and the number of cells per rosette after co-treatment with a 1:20,000 dilution of RIF-OMVs and 0.05 U/mL  $EroS_{Pv}$  (bottom) compared to RIF-OMVs alone (top). (D) *S. rosetta* cells treated with RIF-OMVs (circles) or co-treated with RIF-OMVs and  $EroS_{Pv}$  (triangles) grew at the same rate. Mean density plotted  $\pm$  S.D.
